# Supplementary material for: Facile synthesis of thiazole-functionalized magnetic microspheres for highly specific separation of heme proteins
Source: Royal Society of Chemistry journal article supplement (doi:10.1039/c6nj02755e), 2016-12-24
Supplement: c6nj02755e1.pdf [file c6nj02755e1.pdf]

## Supporting Information

### Facile synthesis of thiazole-functionalized magnetic microspheres for highly specific separation of heme proteins

Binghai Wang<sup>a</sup>, Juanqiang Wang<sup>a</sup>, Qian Shao<sup>a</sup>, Xingjun Xi<sup>b</sup>, Qiao Chu<sup>b</sup>, Genlai Dong<sup>b</sup>  
and Yun Wei<sup>a\*</sup>

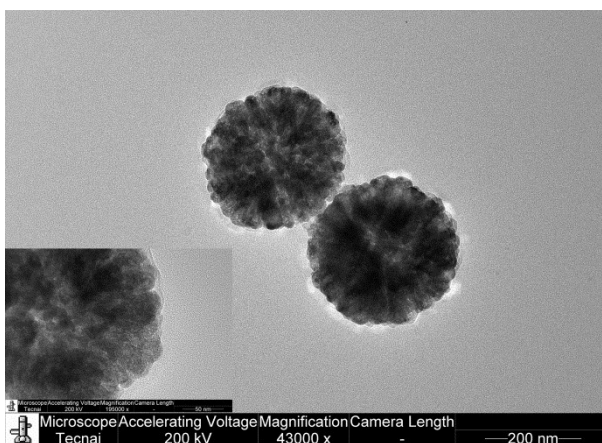

Fig. S1 HRTEM image of Fe<sub>3</sub>O<sub>4</sub> microspheres

---

\* Corresponding author: Yun WEI, State Key Laboratory of Chemical Resource Engineering, Beijing University of Chemical Technology, 15 Beisanhuan East Road, Chaoyang District, Beijing 100029, China, Tel & fax: 0086 10 64442928. E-mail: [weiyun@mail.buct.edu.cn](mailto:weiyun@mail.buct.edu.cn)

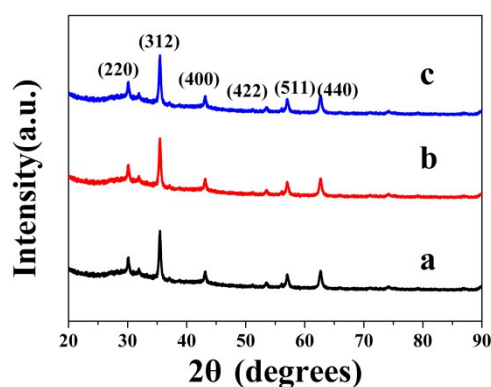

Fig. S2 XRD patterns of  $\text{Fe}_3\text{O}_4$  (a),  $\text{Fe}_3\text{O}_4@\text{SiO}_2$  (b) and  $\text{Fe}_3\text{O}_4@\text{SiO}_2@\text{AT}$  (c)

The diffraction peaks ( $2\theta=30.1^\circ$ ,  $35.5^\circ$ ,  $43.1^\circ$ ,  $53.4^\circ$ ,  $57.0^\circ$  and  $62.6^\circ$ ) for  $\text{Fe}_3\text{O}_4$ ,  $\text{Fe}_3\text{O}_4@\text{SiO}_2$ ,  $\text{Fe}_3\text{O}_4@\text{SiO}_2@\text{AT}$  were indexed as (220), (311), (400), (422), (511) and (440), respectively. The positions of these peaks matched well with database for magnetite in the JCPDS-International Center for Diffraction Data (JCPDS Card: 19-629) file. The XRD patterns indicated that the  $\text{Fe}_3\text{O}_4$  crystalline structure did not change before and after each step of the chemical modification reaction.

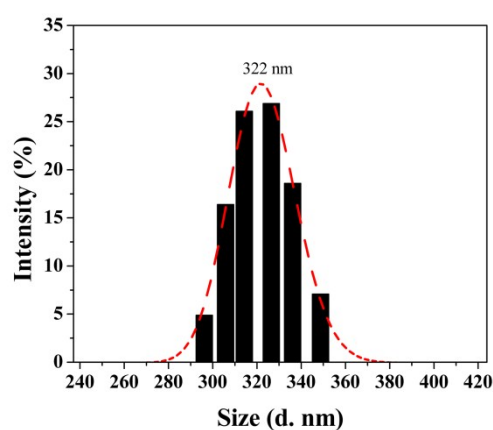

Fig. S3 The size-distribution analysis of  $\text{Fe}_3\text{O}_4@\text{SiO}_2@\text{AT}$  with a log-normal fit

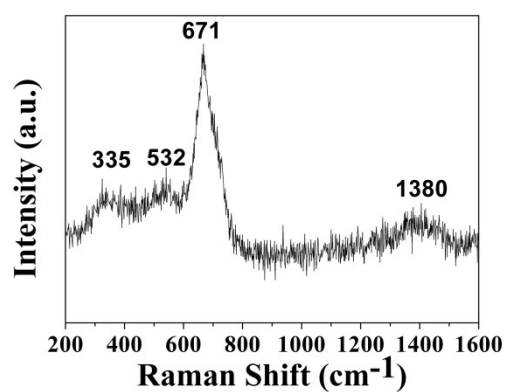

Fig. S4 Raman spectra of Fe<sub>3</sub>O<sub>4</sub> microspheres

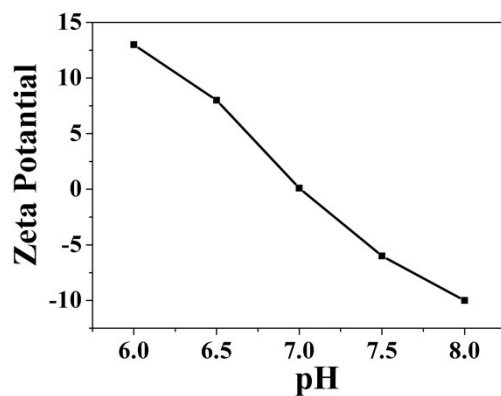

Fig. S5 Zeta potentials of Fe<sub>3</sub>O<sub>4</sub>@SiO<sub>2</sub>@AT in different pH solutions

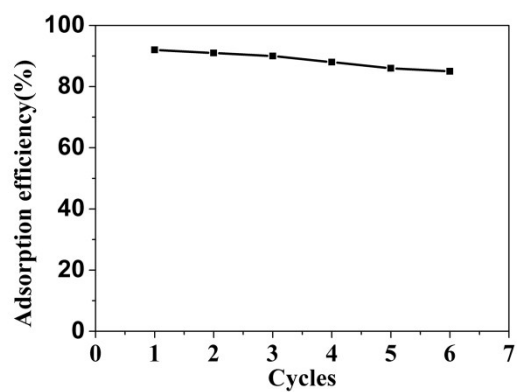

Fig. S6 The use of the recycled Fe<sub>3</sub>O<sub>4</sub>@SiO<sub>2</sub>@AT for hemoglobin adsorption

The result of recycle experiment was shown in Fig. S6. The hemoglobin adsorption-desorption process was repeatedly used for 6 cycles, and the adsorption efficiency was still maintained at 85%. It indicated that the prepared microspheres were very stable for separation of hemoglobin.

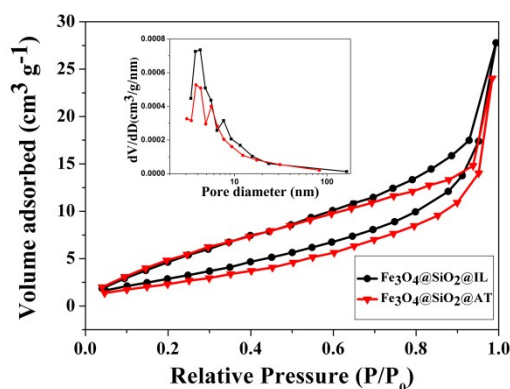

Fig. S7  $N_2$  adsorption/desorption isotherms (at 77K) and the pore size distribution curves (inset) of the  $Fe_3O_4@SiO_2@AT$  and  $Fe_3O_4@SiO_2@IL$  composite

**Table S1 Properties of different adsorbents for hemoglobin capture**

| Adsorption material                              | Size                                                            | Capacity for hemoglobin | Capture time |
|--------------------------------------------------|-----------------------------------------------------------------|-------------------------|--------------|
| Mesoporous silica <sup>62</sup>                  | 50 and 10 $\mu m$ (pore diameters from 6 to 20 nm)              | 300 mg/g                | 30 min       |
| Mesoporous $TiO_2-SiO_2$ <sup>63</sup>           | Wall thickness $\sim 5$ nm (pore diameters from 5.8 to 7.25 nm) | 301.8 mg/g              | 12 h         |
| $Fe_3O_4@SiO_2@IL$ (previous work) <sup>49</sup> | $\sim 300$ nm (pore diameter 13.71 nm)                          | $\sim 2.0$ g/g          | 15 min       |
| $Fe_3O_4@SiO_2@AT$ (This work)                   | 322 nm (pore diameter 11.6 nm)                                  | 2.02 g/g                | 15 min       |

## References

- [49] Y. Wei, Y. Li, A. L. Tian, Y. T. Fan and X. Wang, *J. Mater. Chem. B.*, 2013, **1**, 2066.
- [62] P. Laveille, A. Falcimaigne, F. Chamouleau, G. Renard, J. Drone, F. Fajula, S. Pulvin, D. Thomas, C. Baillyc and A. Galarneau, *New J. Chem.*, 2010, **34**, 2153.
- [63] L. L. Luo, F. Kong, S. Chu, Y. J. Liu, H.Y. Zhu, Y. Wang and Z. G. Zou, *New J. Chem.*, 2011, **35**, 2832.
